# Supplementary material for: HOXA-AS3 Promotes Proliferation and Migration of Hepatocellular Carcinoma Cells via the miR-455-5p/PD-L1 Axis
Source: Hindawi journal article supplement (doi:10.1155/2021/9289719), 2021-12-27

**A**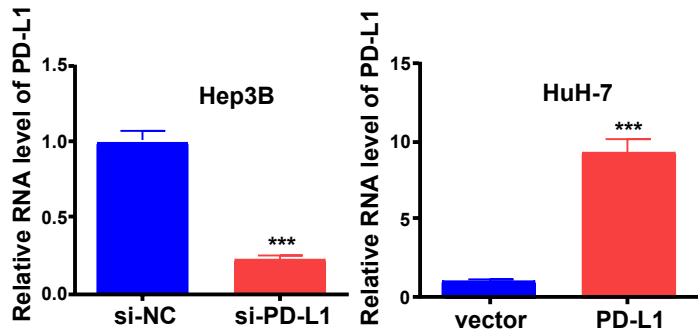**B**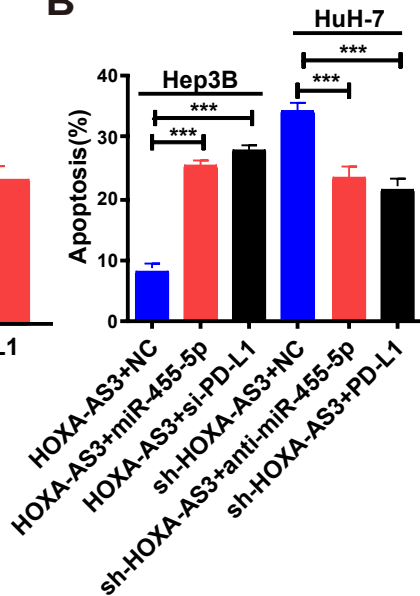**C**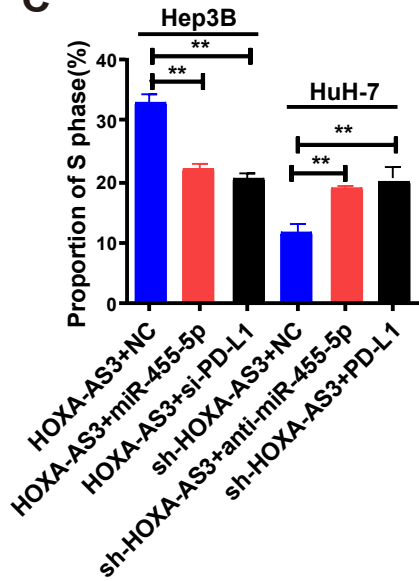

Supplement: f1 [file 9289719.f1.pdf]
